# Supplementary material for: microclim: Global estimates of hourly microclimate based on long-term monthly climate averages
Source: PubMed Central journal article supplement — Sci Data. 2014 May 27;1:140006. doi: 10.1038/sdata.2014.6 (PMC4387738; doi:10.1038/sdata.2014.6), 2014-05-27

**Table S1.** (excel spreadsheet) Summary statistics ( $r^2$  of linear regressions of observed vs. predicted temperature, as well as root mean square deviation (RMSD, °C) and proportional root mean square deviation (RMSDp, decimal %)) for tests of the microclimate predictions (splined to 365 days) against 3-hourly observations of soil temperature from the Soil Climate Analysis Network<sup>37</sup> (SCAN, <http://www.wcc.nrcs.usda.gov/scan/>).

**Script S1.** (R script) An R script showing how to interact with the microclim data files.

**Figure S1.** Three years (2007-2009) of hourly observations (red) of surface and soil temperatures for Perth Airport, Western Australia (a cool temperate coastal location) compared against predictions (black) from Kearney *et al.*<sup>1</sup> using interpolated historical daily data (left column) and from daily interpolations of the monthly predictions from the microclim dataset (right column). The top panels show the simulated air temperature 0.5 cm above the ground (black lines), the observed air temperature 0.5 cm above the ground (red circles – ‘terrestrial minimum’ observations) and the soil surface temperature (grey lines). In all other panels the black lines are predictions and the red lines are observations.

**Figure S2.** Three years (2007-2009) of hourly observations (red) of surface and soil temperatures for Darwin Airport, Northern Territory Australia (a tropical coastal location), compared against predictions (black) from Kearney *et al.*<sup>1</sup> using interpolated historical daily data (left column) and from daily interpolations of the monthly predictions from the microclim dataset (right column). The top panels show the simulated air temperature 0.5 cm above the ground (black lines), the observed air temperature 0.5 cm above the ground (red circles – ‘terrestrial minimum’ observations) and the soil surface temperature (grey lines). In all other panels the black lines are predictions and the red lines are observations.

**Figure S3.** Three years (2007-2009) of hourly observations (red) of surface and soil temperatures for Bushy Parks near Hobart, Tasmania Australia (a cool temperate coastal location) compared against predictions (black) from Kearney *et al.*<sup>1</sup> using interpolated historical daily data (left column) and from daily interpolations of the monthly predictions from the microclim dataset (right column). The top panels show the simulated air temperature 0.5 cm above the ground (black lines), the observed air temperature 0.5 cm above the ground (red circles – ‘terrestrial minimum’ observations) and the soil surface temperature (grey lines). In all other panels the black lines are predictions and the red lines are observations.

**Figure S4.** Three years (2007-2009) of hourly observations (red) of surface and soil temperatures for Wagga Wagga, New South Wales Australia (an inland warm-temperate location) compared against predictions (black) from Kearney *et al.*<sup>1</sup> using interpolated historical daily data (left column) and from daily interpolations of the monthly predictions from the microclim dataset (right column). The top panels show the simulated air temperature 0.5 cm above the ground (black lines), the observed air temperature 0.5 cm above the ground (red circles – ‘terrestrial minimum’ observations) and the soil surface temperature (grey lines). In all other panels the black lines are predictions and the red lines are observations.

**Figures S1-S177** (data repository). Three-hourly observations of soil temperature from the Soil Climate Analysis Network (SCAN) for 177 sites across the USA (including Alaska and Puerto Rico) for all available times between 2011 and 2013 (black lines) plotted against 365-day interpolations of the ‘microclim’ simulations (red). The image of the SCAN site, from <http://www.wcc.nrcs.usda.gov/scan/>, is also shown for comparison.

Figure S1.

Perth Airport

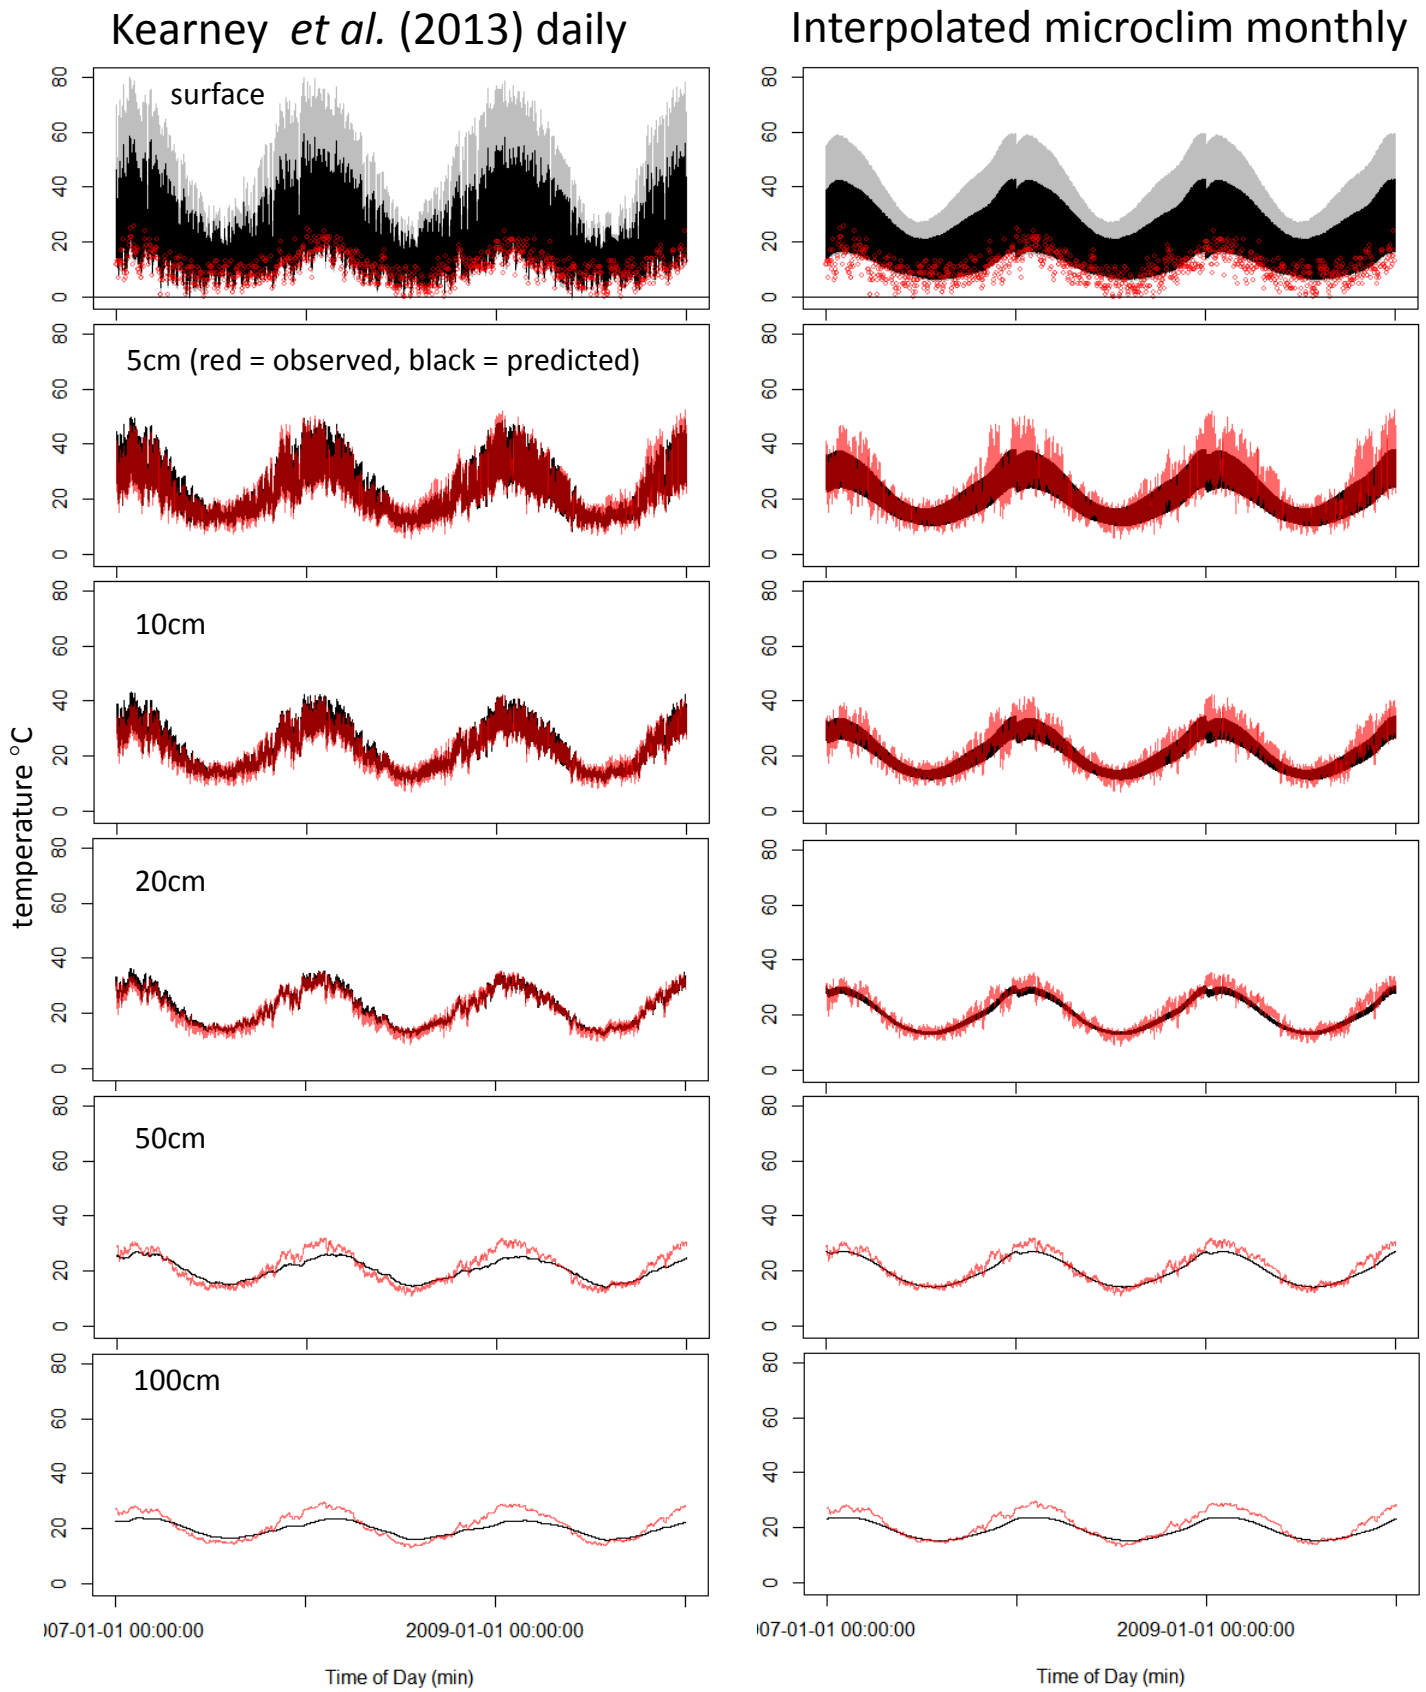

Figure S2.

Darwin Airport

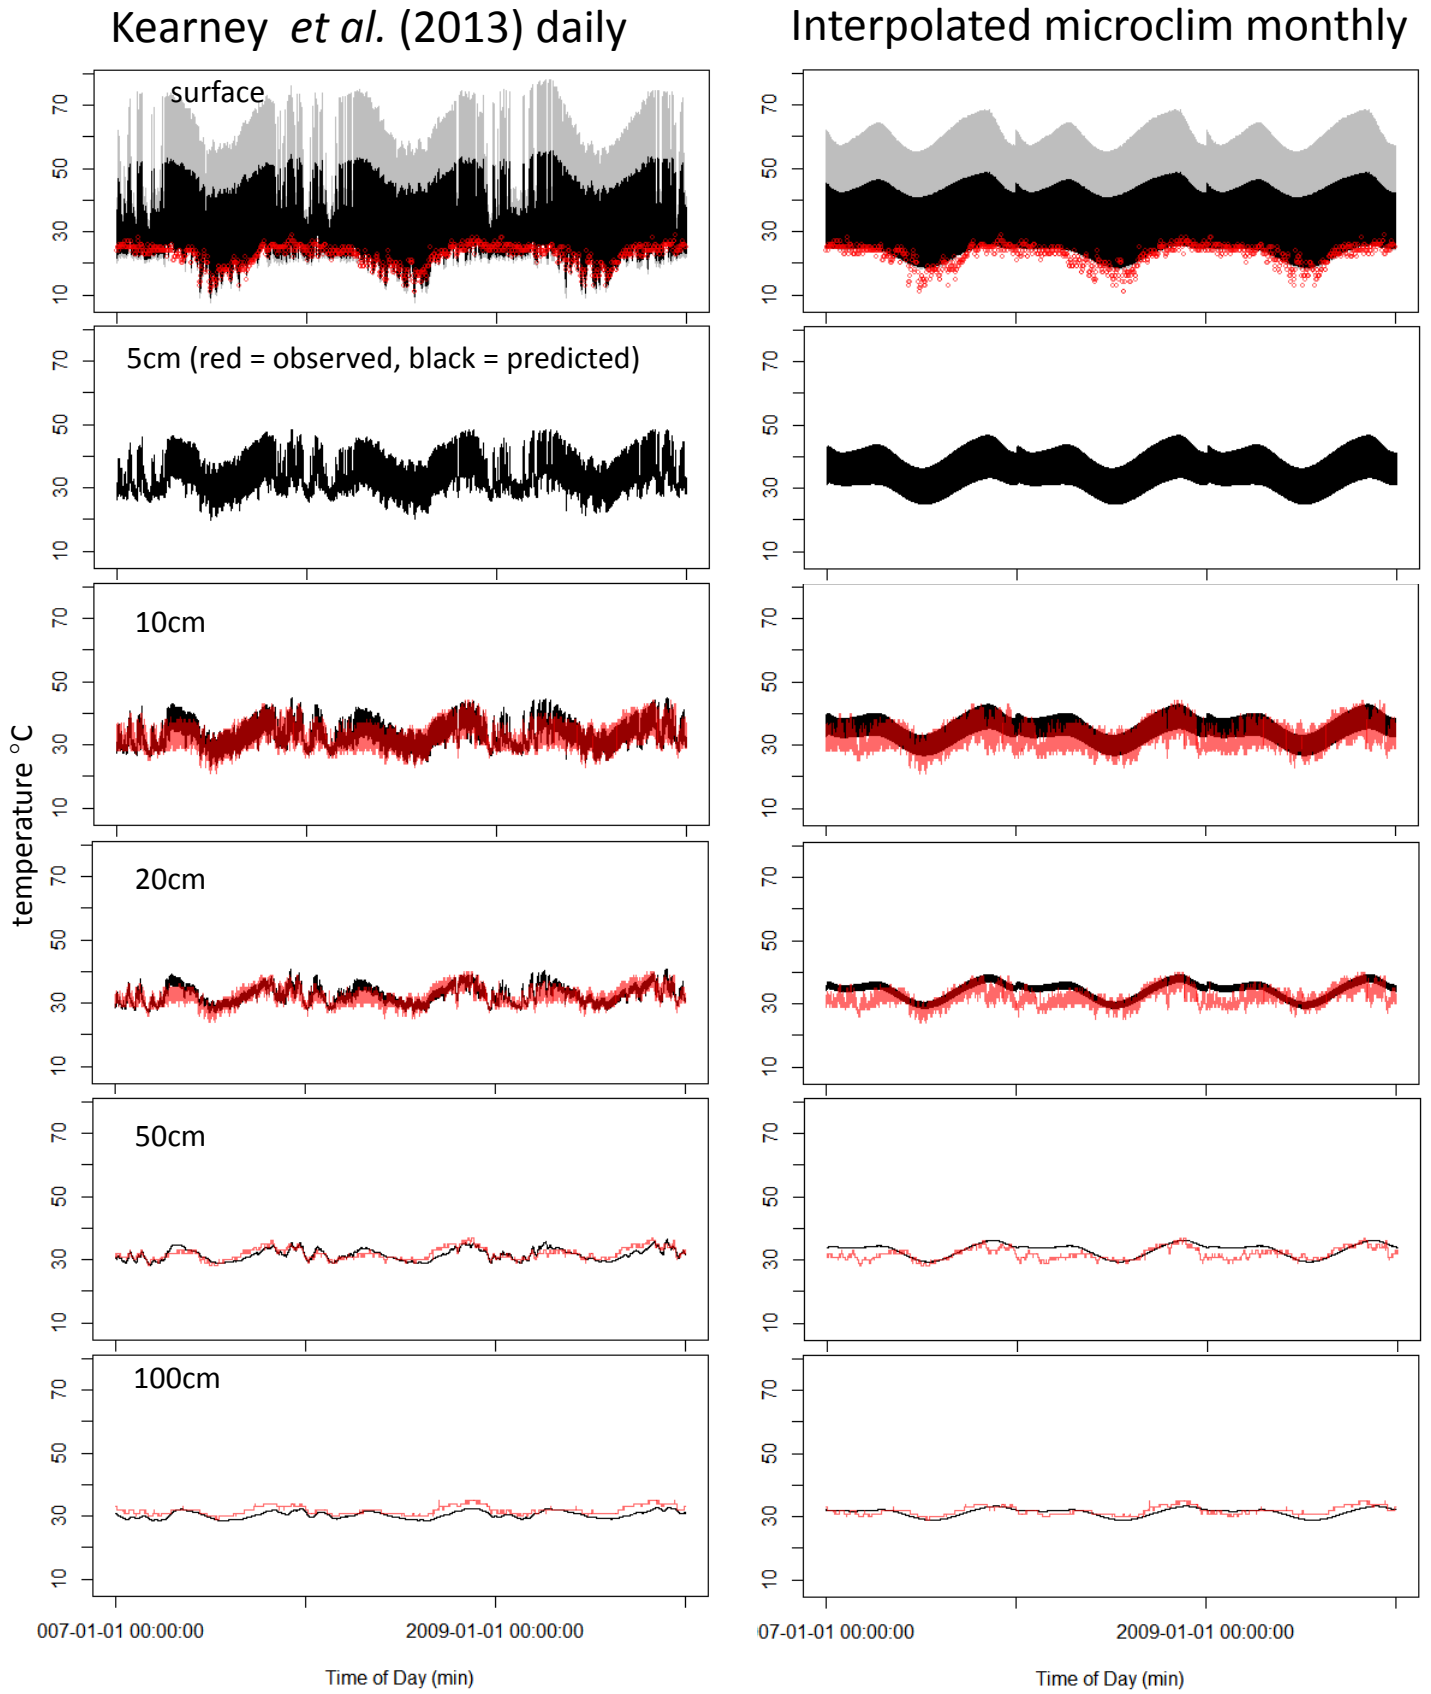

Figure S3.

### Bushy Parks Estates (near Hobart)

Kearney *et al.* (2013) daily

Interpolated microclim monthly

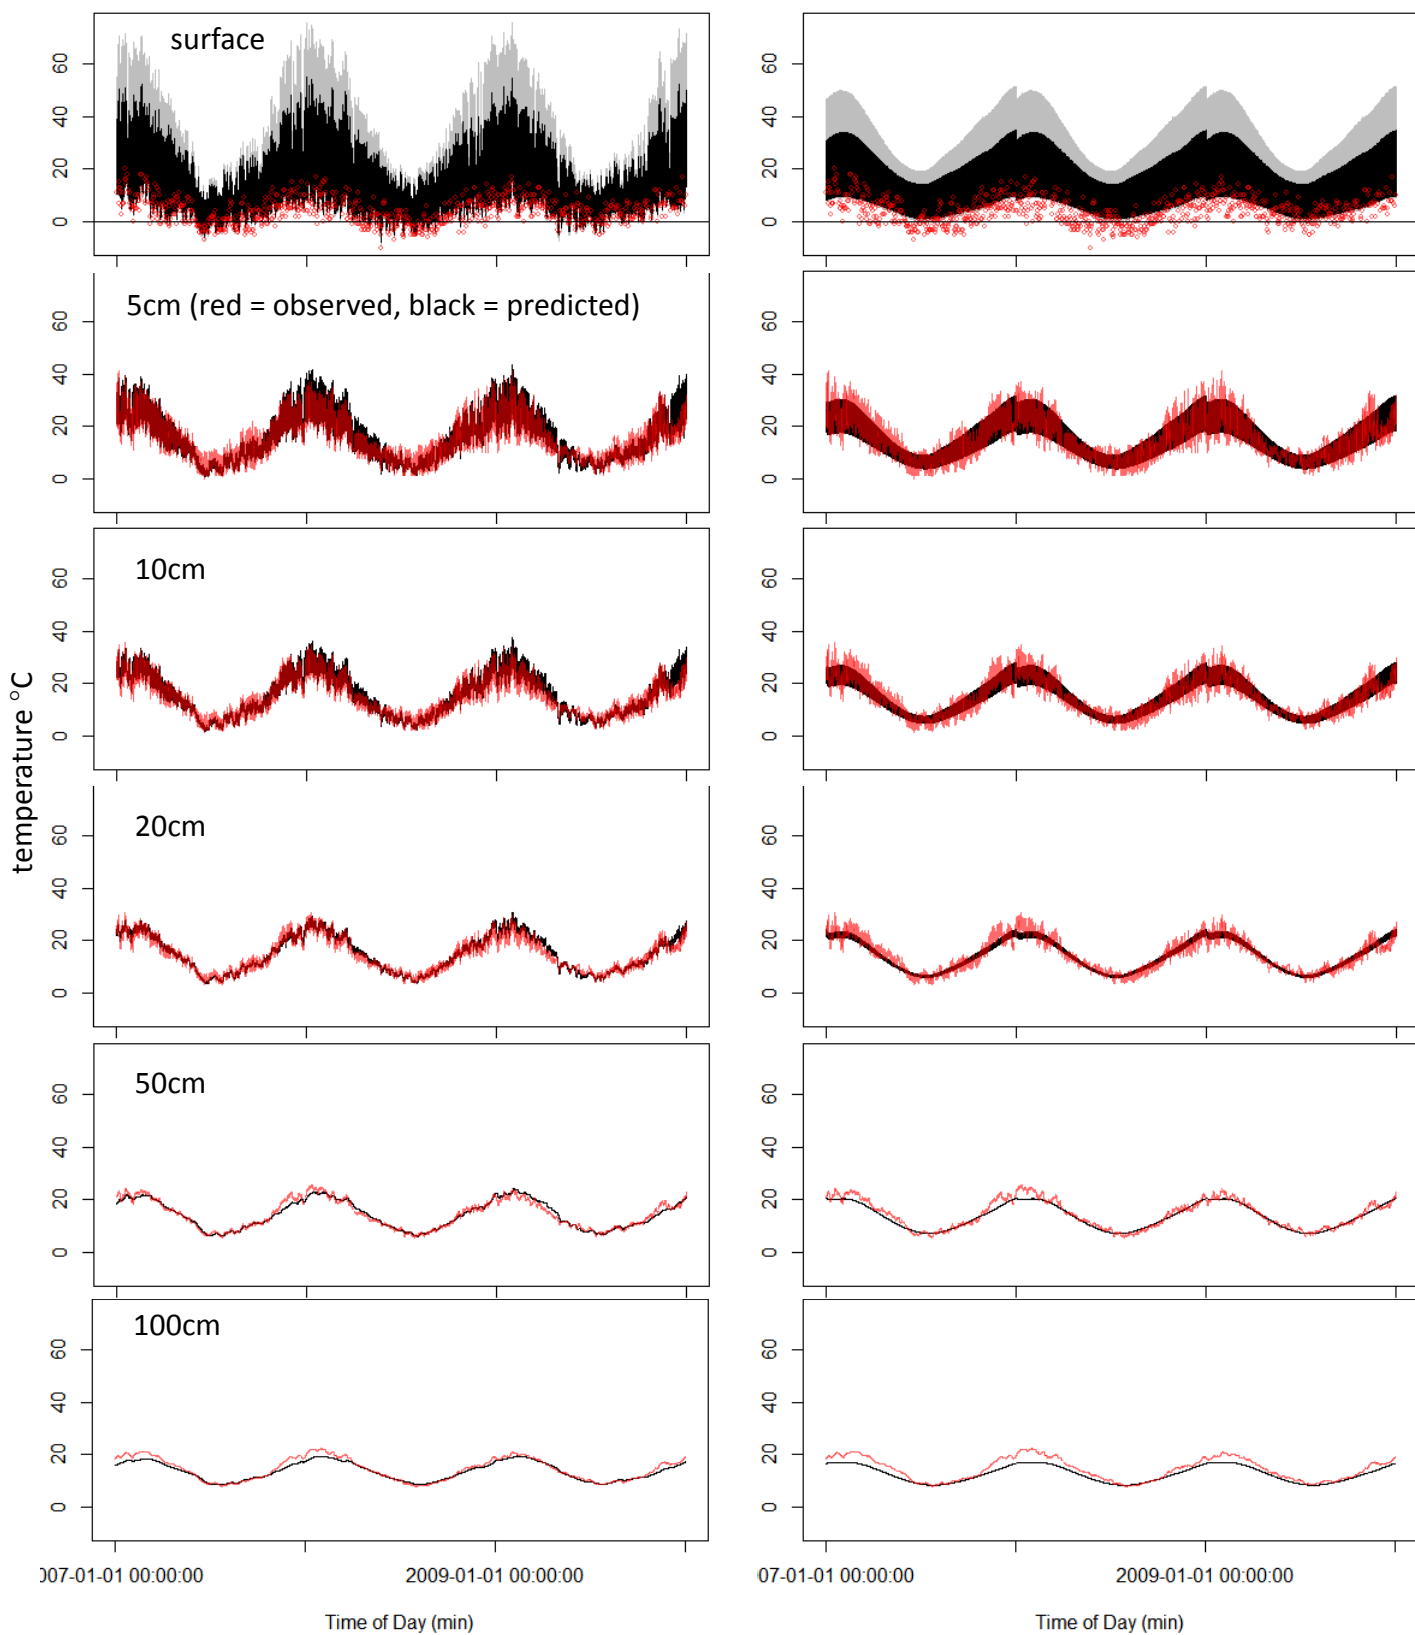

Figure S4.

# Wagga Wagga

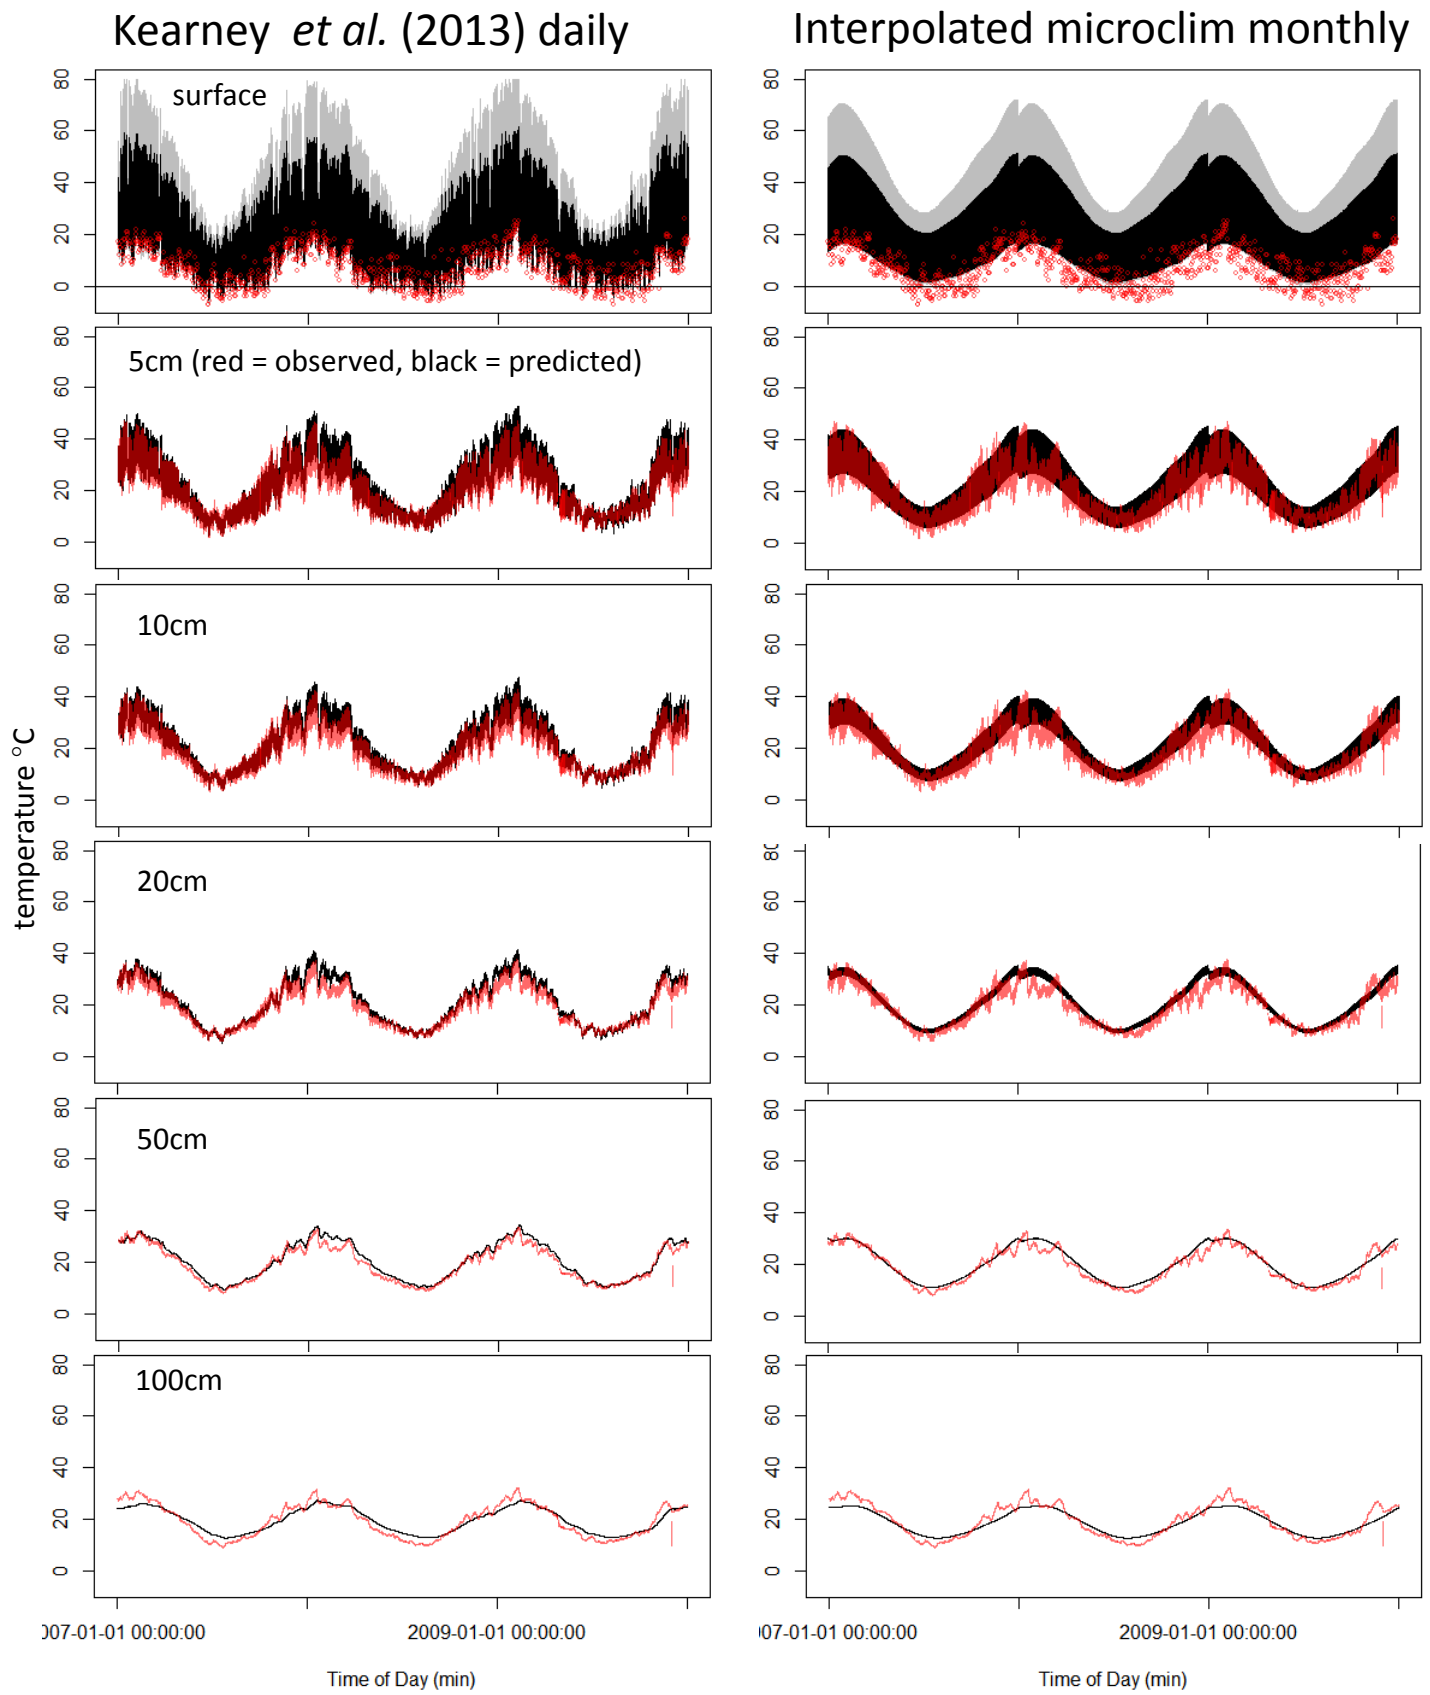

Supplement: sdata20146-s4.pdf [file sdata20146-s4.pdf]
